# Supplementary material
Source: publisher site journal article supplement (https://www.dovepress.com/article/595436)
Supplement: Supplementary file 1 [file 595436.docx]

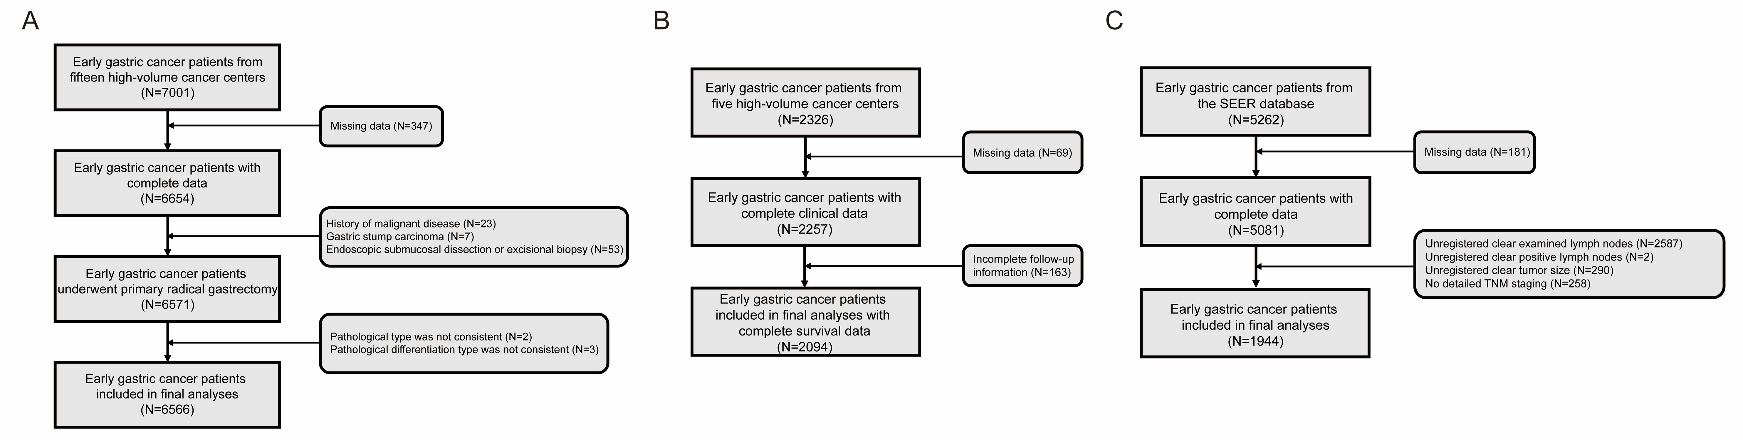


Figure.S1: (A) Inclusion and exclusion criteria for training cohort and validation cohort of 7001 EGC patients from fifteen high-volume cancer centers in China. (B) Inclusion and exclusion criteria for test cohort of 2326 EGC with survival data from five high volume cancer centers in China. (C) Inclusion and exclusion criteria for test cohort of 5262 EGC patients from SEER database.


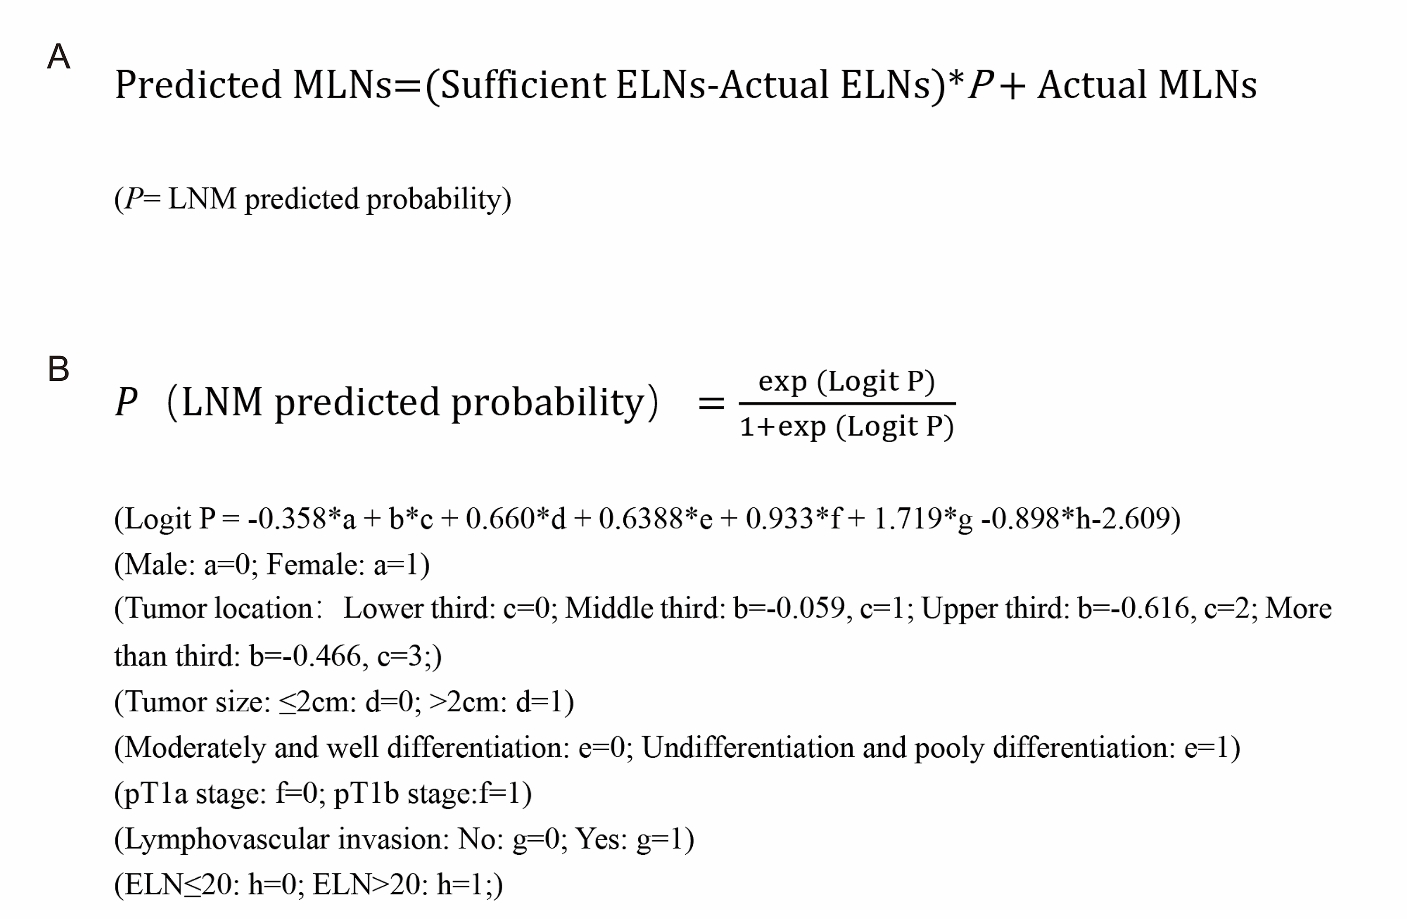


Figure.S2: (A) The calculation formula to obtain the number of predicted MLNs. (B) The calculation formula of LNM probability in logistics regression model

Table.S1 The measurement results of Youden 's Index of each ELN as the cut-off value.

| Cut-off ELN count | Sensitivity (%) | Specificity (%) | Youden’s index |
| --- | --- | --- | --- |
| … | … | … | … |
| 10 | 0.94 | 0.14 | 0.08 |
| 11 | 0.91 | 0.16 | 0.08 |
| 12 | 0.90 | 0.19 | 0.09 |
| 13 | 0.89 | 0.22 | 0.11 |
| 14 | 0.88 | 0.25 | 0.13 |
| 15 | 0.86 | 0.28 | 0.15 |
| 16 | 0.84 | 0.32 | 0.16 |
| 17 | 0.82 | 0.35 | 0.17 |
| 18 | 0.81 | 0.39 | 0.20 |
| 19 | 0.79 | 0.43 | 0.22 |
| 20 | 0.77 | 0.47 | 0.24 |
| 21 | 0.72 | 0.51 | 0.23 |
| 22 | 0.69 | 0.54 | 0.23 |
| 23 | 0.65 | 0.57 | 0.22 |
| 24 | 0.62 | 0.60 | 0.22 |
| 25 | 0.58 | 0.63 | 0.21 |
| 26 | 0.55 | 0.65 | 0.21 |
| 27 | 0.52 | 0.68 | 0.19 |
| 28 | 0.47 | 0.70 | 0.17 |
| 29 | 0.45 | 0.72 | 0.17 |
| 30 | 0.41 | 0.74 | 0.15 |
| … | … | … | … |

Table.S2 Clinicopathological characteristics of 6566 EGC patients

| Clinicopathological characteristics | N=6566 | % |
| --- | --- | --- |
| Sex |  |  |
| Male | 4636 | 70.61 |
| Female | 1930 | 29.39 |
| Age at surgery (years) |  |  |
| <65 | 4681 | 71.29 |
| ≥65 | 1885 | 28.71 |
| Tumor location |  |  |
| Lower 1/3 | 3735 | 56.88 |
| Middle 1/3 | 1046 | 15.93 |
| Upper 1/3 | 1383 | 21.06 |
| More than 1/3 stomach | 402 | 6.12 |
| Tumor size |  |  |
| ≤2cm | 3672 | 55.92 |
| >2cm | 2894 | 44.08 |
| Differentiation type |  |  |
| Moderately or well | 2623 | 39.95 |
| Undifferentiated or poorly | 3943 | 60.05 |
| Lauren type |  |  |
| Intestinal | 2913 | 44.36 |
| Diffuse | 2081 | 31.69 |
| Mixed | 1572 | 23.94 |
| pT stage |  |  |
| T1a | 2846 | 43.34 |
| T1b | 3720 | 56.66 |
| pN stage |  |  |
| N0 | 5516 | 84.01 |
| N1 | 594 | 9.05 |
| N2 | 318 | 4.84 |
| N3a | 112 | 1.71 |
| N3b | 26 | 0.40 |
| pTNM stage |  |  |
| Ⅰ A | 5516 | 84.01 |
| Ⅰ B | 594 | 9.05 |
| Ⅱ A | 318 | 4.84 |
| Ⅱ B | 112 | 1.71 |
| Ⅲ B | 26 | 0.40 |
| Perineural invasion |  |  |
| No | 6199 | 94.41 |
| Yes | 367 | 5.59 |
| Lymphovascular invasion |  |  |
| No | 5954 | 90.68 |
| Yes | 612 | 9.32 |
| Examined lymph nodes count |  |  |
| ≤20 | 2823 | 42.99 |
| >20 | 3743 | 57.01 |

Table.S3 Comparison of clinicopathological characteristics between the training and validation cohorts of EGC patients

| Clinicopathological characteristics | Training cohort  n = 4597 (%) | Validation cohort  n = 1969 (%) | *P* value |
| --- | --- | --- | --- |
| Sex |  |  | 0.778 |
| Male | 3241 (70.50) | 1395 (70.85) |  |
| Female | 1356 (29.50) | 574 (29.15) |  |
| Age at surgery (years) |  |  | 0.430 |
| <65 | 3264 (71.00) | 1417 (71.97) |  |
| ≥65 | 1333 (29.00) | 552 (28.03) |  |
| Tumor location |  |  | 0.463 |
| Lower 1/3 | 2590 (56.34) | 1145 (58.15) |  |
| Middle 1/3 | 741 (16.12) | 305 (15.49) |  |
| Upper 1/3 | 974 (21.19) | 409 (20.77) |  |
| More than 1/3 stomach | 292 (6.35) | 110 (5.59) |  |
| Tumor size |  |  | 0.411 |
| ≤2cm | 2586 (56.25) | 1086 (55.15) |  |
| >2cm | 2011 (43.75) | 883 (44.85) |  |
| Differentiation type |  |  | 0.160 |
| Moderately or well | 1862 (40.50) | 761 (38.65) |  |
| Undifferentiated or poorly | 2735 (59.50) | 1208 (61.35) |  |
| Lauren type |  |  | 0.375 |
| Intestinal | 2064 (44.90) | 849 (43.12) |  |
| Diffuse | 1449 (31.52) | 632 (32.10) |  |
| Mixed | 1084 (23.58) | 488 (24.78) |  |
| pT stage |  |  | 0.722 |
| T1a | 1986 (43.20) | 860 (43.68) |  |
| T1b | 2611 (56.80) | 1109 (56.32) |  |
| pN stage |  |  | 0.743 |
| N0 | 3874 (84.27) | 1642 (83.39) |  |
| N1 | 412 (8.96) | 182 (9.24) |  |
| N2 | 215 (4.68) | 103 (5.23) |  |
| N3a | 76 (1.65) | 36 (1.83) |  |
| N3b | 20 (0.44) | 6 (0.30) |  |
| Metastatic lymph nodes count |  |  | 0.789 |
| Median (P25, P75) | 0 (0,0) | 0 (0,0) |  |
| Examined lymph nodes count |  |  | 0.227 |
| Median (P25, P75) | 22 (15,32) | 23 (16,33) |  |
| Perineural invasion |  |  | 0.634 |
| No | 4336 (94.32) | 1863 (94.62) |  |
| Yes | 261 (5.68) | 106 (5.38) |  |
| Lymphovascular invasion |  |  | 0.678 |
| No | 4173 (90.78) | 1781 (90.45) |  |
| Yes | 424 (9.22) | 188 (9.55) |  |
| Examined lymph nodes count |  |  | 0.086 |
| ≤20 | 2008 (43.68) | 815 (41.39) |  |
| >20 | 2589 (56.32) | 1154 (58.61) |  |

Table.S4 Clinicopathological characteristics of 2094 EGC patients in multicenter dataset

| Clinicopathological characteristics | N=2094 | % |
| --- | --- | --- |
| Sex |  |  |
| Male | 1337 | 63.85 |
| Female | 757 | 36.15 |
| Age at surgery (years) |  |  |
| <65 | 1560 | 74.50 |
| ≥65 | 534 | 25.50 |
| Tumor location |  |  |
| Lower 1/3 | 1261 | 60.22 |
| Middle 1/3 | 347 | 16.57 |
| Upper 1/3 | 438 | 20.92 |
| More than 1/3 stomach | 48 | 2.29 |
| Tumor size |  |  |
| ≤2cm | 1092 | 52.15 |
| >2cm | 1002 | 47.85 |
| Differentiation type |  |  |
| Moderately or well | 803 | 38.35 |
| Undifferentiated or poorly | 1291 | 61.65 |
| Lauren type |  |  |
| Intestinal | 1175 | 56.11 |
| Diffuse | 554 | 26.46 |
| Mixed | 365 | 17.43 |
| pT stage |  |  |
| T1a | 900 | 42.98 |
| T1b | 1194 | 57.02 |
| pN stage |  |  |
| N0 | 1654 | 78.99 |
| N1 | 251 | 11.99 |
| N2 | 140 | 6.69 |
| N3a | 40 | 1.91 |
| N3b | 9 | 0.43 |
| pTNM stage |  |  |
| Ⅰ A | 1654 | 78.99 |
| Ⅰ B | 251 | 11.99 |
| Ⅱ A | 140 | 6.69 |
| Ⅱ B | 40 | 1.91 |
| Ⅲ B | 9 | 0.43 |
| Perineural invasion |  |  |
| No | 2025 | 96.70 |
| Yes | 69 | 3.30 |
| Lymphovascular invasion |  |  |
| No | 1914 | 91.40 |
| Yes | 180 | 8.60 |
| Examined lymph nodes count |  |  |
| ≤20 | 590 | 28.18 |
| >20 | 1504 | 71.82 |

Table.S5 Clinicopathological characteristics of 1944 EGC patients in SEER dataset

| Clinicopathological characteristics | N=1944 | % |
| --- | --- | --- |
| Sex |  |  |
| Male | 1208 | 62.14 |
| Female | 736 | 37.86 |
| Age at surgery (years) |  |  |
| <65 | 651 | 33.49 |
| ≥65 | 1293 | 66.51 |
| Tumor location |  |  |
| Lower 1/3 | 681 | 35.03 |
| Middle 1/3 | 220 | 11.32 |
| Upper 1/3 | 626 | 32.20 |
| More than 1/3 stomach | 417 | 21.45 |
| Tumor size |  |  |
| ≤2cm | 1096 | 56.38 |
| >2cm | 848 | 43.62 |
| Differentiation type |  |  |
| Moderately or well | 1029 | 52.93 |
| Undifferentiated or poorly | 915 | 47.07 |
| pT stage |  |  |
| T1a | 742 | 38.17 |
| T1b | 1202 | 61.83 |
| pN stage |  |  |
| N0 | 1592 | 81.89 |
| N1 | 222 | 11.42 |
| N2 | 98 | 5.04 |
| N3a | 26 | 1.34 |
| N3b | 6 | 0.31 |
| pTNM stage |  |  |
| Ⅰ A | 1592 | 81.89 |
| Ⅰ B | 222 | 11.42 |
| Ⅱ A | 98 | 5.04 |
| Ⅱ B | 26 | 1.34 |
| Ⅲ B | 6 | 0.31 |
| Lymphovascular invasion |  |  |
| No | 1944 | 100.00 |
| Yes | 0 | 0.00 |
| Lymph nodes metastasis |  |  |
| No | 1592 | 81.89 |
| Yes | 352 | 18.11 |
| Examined lymph nodes count |  |  |
| ≤20 | 1391 | 71.55 |
| >20 | 553 | 28.45 |
